# Supplementary material for: A combined kinetico-mechanistic and computational study on the competitive formation of seven- versus five-membered platinacycles; the relevance of spectator halide ligands
Source: Royal Society of Chemistry journal article supplement (doi:10.1039/c5dt02657a), 2015-01-01
Supplement: c5dt02657a1.pdf [file c5dt02657a1.pdf]

**A combined kinetic-mechanistic and computational study on the competitive formation of seven- *versus* five-membered platinacycles; the relevance of spectator halide ligands**

*Gabriel Aullón,<sup>a</sup> Margarita Crespo,<sup>a</sup> Mercè Font-Bardia,<sup>b</sup> Jesús Jover,<sup>a</sup> Manuel Martínez,<sup>a</sup> Jack Pike<sup>a</sup>*

<sup>a</sup> Departament de Química Inorgànica, Universitat de Barcelona, Martí i Franquès 1-11, E-08028 Barcelona, Spain

<sup>b</sup> Unitat de Difracció de RX. Centres Científics i Tecnològics de la Universitat de Barcelona (CCiTUB). Universitat de Barcelona. Solé i Sabarís 1-3. 08028-Barcelona

***Supporting Information***

**Table S1.-** Values of  $k_{\text{obs}}$  for all the systems studied in xylene solution as a function of temperature and pressure,  $[\text{Pt}] = (0.5\text{-}5.0)\times 10^{-4}$  M.

| System                                               | $T / ^\circ\text{C}$ | $P / \text{atm}$ | $k_{\text{obs}} / \text{s}^{-1}$ |
|------------------------------------------------------|----------------------|------------------|----------------------------------|
| <b>5-IV-Br,F</b> $\rightleftharpoons$ <b>II-Br,F</b> | 60                   | 1                | $2.3 \square 10^{-5}$            |
|                                                      | 60                   | 400              | $2.7 \square 10^{-5}$            |
|                                                      | 60                   | 700              | $2.8 \square 10^{-5}$            |
|                                                      | 60                   | 950              | $3.8 \square 10^{-5}$            |
|                                                      | 60                   | 1200             | $5.5 \square 10^{-5}$            |
|                                                      | 60                   | 1500             | $6.5 \square 10^{-5}$            |
|                                                      | 70                   | 1                | $9.8 \square 10^{-5}$            |
|                                                      | 80                   | 1                | $36 \square 10^{-5}$             |
|                                                      | 90                   | 1                | $93 \square 10^{-5}$             |
| <b>II-Br,F</b> $\rightleftharpoons$ <b>II'-Br,F</b>  | 55                   | 400              | $2.3 \square 10^{-5}$            |
|                                                      | 55                   | 700              | $2.5 \square 10^{-5}$            |
|                                                      | 55                   | 950              | $2.5 \square 10^{-5}$            |
|                                                      | 55                   | 1200             | $3.2 \square 10^{-5}$            |
|                                                      | 55                   | 1500             | $3.1 \square 10^{-5}$            |
|                                                      | 60                   | 1                | $4.6 \square 10^{-5}$            |
|                                                      | 70                   | 1                | $7.8 \square 10^{-5}$            |
|                                                      | 80                   | 1                | $13 \square 10^{-5}$             |
|                                                      | 90                   | 1                | $20 \square 10^{-5}$             |
| <b>5-IV-Cl,F</b> $\rightleftharpoons$ <b>II-Cl,F</b> | 60                   | 1                | 0.0015                           |
|                                                      | 70                   | 1                | 0.0059                           |
|                                                      | 80                   | 1                | 0.0075                           |
|                                                      | 89                   | 1                | 0.012                            |
| <b>II-Cl,F</b> $\rightleftharpoons$ <b>II'-Cl,F</b>  | 60                   | 1                | $3.7 \square 10^{-5}$            |
|                                                      | 70                   | 1                | $7.8 \square 10^{-5}$            |
|                                                      | 80                   | 1                | $18 \square 10^{-5}$             |
|                                                      | 89                   | 1                | $87 \square 10^{-5}$             |
| <b>II-Cl,F</b> $\rightleftharpoons$ <b>7-II-Cl,F</b> | 70                   | 1                | $2.3 \square 10^{-5}$            |
|                                                      | 80                   | 1                | $4.1 \square 10^{-5}$            |
|                                                      | 89                   | 1                | $7.7 \square 10^{-5}$            |

**Table S2.-** Computed relative free energy values (in  $\text{kJ mol}^{-1}$ ) for the formation of **7-II-X,F** from **II'-X,F** according to Scheme 6, bottom .

| Step/X          | Br    | Cl    |
|-----------------|-------|-------|
| <b>II'-X,F</b>  | 0.0   | 0.0   |
| <b>II'a-X,F</b> | 89.3  | 90.8  |
| <b>TS_CH2</b>   | 138.1 | 137.1 |
| <b>II'c-X,F</b> | 121.5 | 119.5 |
| <b>TS_RE2</b>   | 137.5 | 136.4 |
| <b>7-II-X,F</b> | -44.4 | -44.9 |

**Table S3.-** Computed B3LYP electronic energy ( $E_{el}$ ) with the large basis sets (6-311+G\*\*/aug-cc-pVTZ), thermal correction to the enthalpy ( $H_{corr}$ ) and entropic term ( $T\Delta S$ ), and free energy values (in Hartrees) in xylene for all the species at 139°C.  $H_{corr}$  contains the zero-point energy, the vibrational, rotational and translational energies as well as the thermal correction (RT). The final free energies are obtained with the formula:  $\Delta G_{139^\circ C} = E_{el} + H_{corr} - T\Delta S$

| Species      | $E_{el}$    | $H_{corr}$ | $TDS$  | $\Delta G_{139^\circ C}$ |
|--------------|-------------|------------|--------|--------------------------|
| II-Br,H (E)  | -1616.53152 | 0.5171     | 0.1317 | -1616.14607              |
| II-Br,H (Z)  | -1616.53207 | 0.5174     | 0.1309 | -1616.14562              |
| Ila-Br,H     | -1616.48907 | 0.5152     | 0.1352 | -1616.10909              |
| TS_Isom-Br,H | -1616.46936 | 0.5146     | 0.1385 | -1616.09334              |
| II'a-Br,H    | -1616.50038 | 0.5164     | 0.1338 | -1616.11777              |
| II'-Br,H (E) | -1616.53978 | 0.5171     | 0.1294 | -1616.15209              |
| II'-Br,H (Z) | -1616.53747 | 0.5174     | 0.1292 | -1616.14923              |
| TS_CH1-Br,H  | -1616.48343 | 0.5113     | 0.1344 | -1616.10653              |
| II'b-Br,H    | -1616.48584 | 0.5130     | 0.1351 | -1616.10796              |
| TS_RE1-Br,H  | -1616.47586 | 0.5115     | 0.1338 | -1616.09820              |
| 5-II-Br,H    | -1344.88474 | 0.3792     | 0.1032 | -1344.60871              |
| TS_CH2-Br,H  | -1616.47531 | 0.5110     | 0.1320 | -1616.09633              |
| II'c-Br,H    | -1616.48478 | 0.5115     | 0.1306 | -1616.10395              |
| TS_RE2-Br,H  | -1616.47835 | 0.5111     | 0.1296 | -1616.09684              |
| 7-II-Br,H    | -1344.87498 | 0.3795     | 0.1011 | -1344.59659              |
| II'-Br,F (E) | -1715.80537 | 0.5096     | 0.1227 | -1715.41854              |
| II'a-Br,F    | -1715.76639 | 0.5089     | 0.1270 | -1715.38452              |
| TS_CH2-Br,F  | -1715.74347 | 0.5036     | 0.1259 | -1715.36594              |
| II'c-Br,F    | -1715.75294 | 0.5051     | 0.1243 | -1715.37227              |
| TS_RE2-Br,F  | -1715.74581 | 0.5036     | 0.1239 | -1715.36615              |
| 7-II-Br,F    | -1444.14350 | 0.3722     | 0.0969 | -1443.86834              |
| II-Cl,H (E)  | -1659.83421 | 0.5175     | 0.1269 | -1659.44366              |
| II-Cl,H (Z)  | -1659.83487 | 0.5178     | 0.1263 | -1659.44338              |
| Ila-Cl,H     | -1659.79008 | 0.5153     | 0.1338 | -1659.40858              |
| TS_Isom-Cl,H | -1659.77009 | 0.5147     | 0.1349 | -1659.39031              |
| II'a-Cl,H    | -1659.80339 | 0.5166     | 0.1319 | -1659.41869              |
| II'-Cl,H (E) | -1659.84347 | 0.5172     | 0.1297 | -1659.45596              |
| II'-Cl,H (Z) | -1659.84104 | 0.5177     | 0.1280 | -1659.45136              |
| TS_CH1-Cl,H  | -1659.78721 | 0.5115     | 0.1314 | -1659.40705              |
| II'b-Cl,H    | -1659.78928 | 0.5131     | 0.1311 | -1659.40726              |
| TS_RE1-Cl,H  | -1659.77809 | 0.5116     | 0.1302 | -1659.39671              |
| 5-II-Cl,H    | -1388.18827 | 0.3793     | 0.1014 | -1387.91035              |
| TS_CH2-Cl,H  | -1659.77982 | 0.5113     | 0.1303 | -1659.39891              |
| II'c-Cl,H    | -1659.78923 | 0.5115     | 0.1264 | -1659.40417              |
| TS_RE2-Cl,H  | -1659.78270 | 0.5113     | 0.1277 | -1659.39916              |
| 7-II-Cl,H    | -1388.17891 | 0.3799     | 0.0987 | -1387.89763              |
| II'-Cl,F (E) | -1759.10887 | 0.5097     | 0.1210 | -1758.72028              |
| II'a-Cl,F    | -1759.06950 | 0.5091     | 0.1252 | -1758.68570              |
| TS_CH2-Cl,F  | -1759.04684 | 0.5037     | 0.1248 | -1758.66807              |
| II'c-Cl,F    | -1759.05748 | 0.5053     | 0.1225 | -1758.67478              |
| TS_RE2-Cl,F  | -1759.05011 | 0.5038     | 0.1219 | -1758.66833              |
| 7-II-Cl,F    | -1487.44730 | 0.3724     | 0.0953 | -1487.17029              |
| Toluene      | -271.65490  | 0.1359     | 0.0512 | -271.57017               |

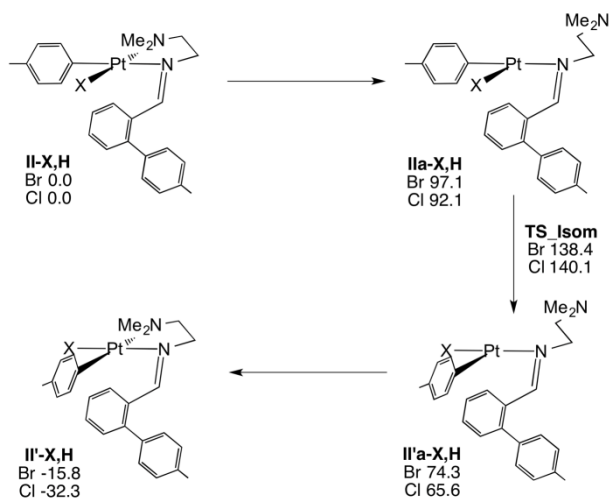

**Figure S1.**- Isomerization process transforming  $\text{II-X,H}$  into  $\text{II'-X,H}$  (free energies in  $\text{kJ mol}^{-1}$ ).

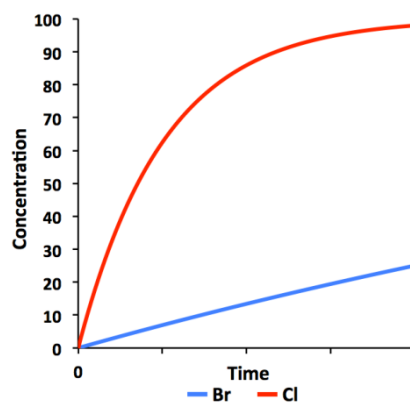

**Figure S2.**- Qualitative product concentration  $\text{II'-X,F}$  vs  $7\text{-II-X,F}$  evolution over time for ( $X = \text{Br, Cl}$ ) in arbitrary time scale.
